# Supplementary material for: Impact of a “Brain Protection Bundle” in Reducing Severe Intraventricular Hemorrhage in Preterm Infants <30 Weeks GA: A Retrospective Single Centre Study
Source: MDPI journal article supplement (doi:10.3390/children8110983), 2021-10-31
Supplement: s1 [file s1]

**"Promoting Brain Health"**

**NICU IVH Bundle**

**For all Infants less than 30 Weeks Gestational Age**

**IVH Bundle for the first 72 h in the NICU**

**\*\* All interventions are "as medically indicated" \*\***

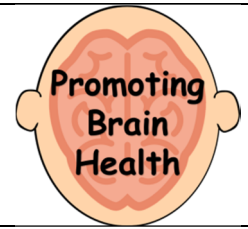

**Maternal interventions**

- Optimization of antenatal steroid administration
- Identifying mothers with suspected or confirmed chorioamnionitis
- Identifying any other risk factors that may lead to hemodynamic instability in infants

**Identify Infant**

- Fill out IVH ID card with time of birth and 72 h END time clearly written
- Place IVH cards on incubator and on door

**Head of the bed should be elevated**

- **Elevate head of bed** – At the highest level so that when you pull out X-ray tray it slides out easily
- If bed needs to be levelled-slow and steady
- "Nesting" of infant to keep from sliding down

**Keep head and body midline (ears, shoulder and hips should be in a straight line)**

- Use rolls or "froggie" whenever possible
- No prone position for 72 h. No lateral positioning (unless clinically indicated)
- **Two person handling and repositioning for:**
  - Any repositioning where there is a risk of turning head
  - X-ray : Avoid levelling the bed if possible—consider dorsal-decubitus (cross-table) view
  - Weight or linen change (if indicated)
  - Transfer (if indicated)
  - Change/removal of polyethylene occlusive plastic wrap up to 6 h (as per policy)
  - Skin to skin if permitted
  - Back assessment—rotate laterally once daily unless clinically indicated

**Medications**

- Premedication preferred for all endotracheal tube insertions (unless in emergency)
- Gentle application of eye ointment (if not already given in Resuscitation room)
- **Mepitel** dressings—for all infants 22 <sup>0/7</sup> to 24 <sup>6/7</sup> weeks gestation—use Mepitel dressing over chest to secure leads (avoid direct contact of leads to skin)

**BP Monitoring**

- **When UAC present**
  - Do not use manual BP unless clinically unstable and correlation is required (inotropes)
  - Any flushing/withdrawal needs to be slow and steady (minimum 30 s each step)
- **When no UAC present**
  - *Greater than 27 weeks* - If clinically stable, BP once a shift
  - *Less than 27 weeks* – If clinically stable, BP q6 or as indicated by infant status

**No routine weights**

- Use the Birth weight (BW) unless otherwise indicated by clinical status
- If weight is required – MUST be done as a 2 person process

|                                                                                                                                                                                                                                                                                                                                                                                                                                                                                                                                                                                                                                                                                                                                                                                                                                                                                                                                                                                                                                                                                                                                                                                                                                                               |
|---------------------------------------------------------------------------------------------------------------------------------------------------------------------------------------------------------------------------------------------------------------------------------------------------------------------------------------------------------------------------------------------------------------------------------------------------------------------------------------------------------------------------------------------------------------------------------------------------------------------------------------------------------------------------------------------------------------------------------------------------------------------------------------------------------------------------------------------------------------------------------------------------------------------------------------------------------------------------------------------------------------------------------------------------------------------------------------------------------------------------------------------------------------------------------------------------------------------------------------------------------------|
| <p><b>Pain Management and Comfort</b></p> <ul style="list-style-type: none"> <li>• Minimize noise in the room</li> <li>• Monitor PIPP scores regularly</li> <li>• Provide <b>OIT (Oral Immune Therapy)</b> regularly as an option for additional comfort measures</li> </ul>                                                                                                                                                                                                                                                                                                                                                                                                                                                                                                                                                                                                                                                                                                                                                                                                                                                                                                                                                                                  |
| <p><b>Minimal Handling</b></p> <ul style="list-style-type: none"> <li>• <b>No routine linen changes:</b> If required – MUST be done as a 2 person process</li> <li>• Removal of polyethylene occlusive plastic wrap as a 2 person process</li> <li>• <b>No abdominal girth</b> unless clinically indicated</li> <li>• <b>No bathing</b> unless clinically indicated (Infant born to mother with HIV)</li> <li>• <b>No axilla temperatures</b> – use skin probe temperature – unless clinically indicated for correlations</li> <li>• <b>Head Circumference (HC)</b> to be performed in Resuscitation Room – avoid lifting head</li> <li>• <b>Assessments</b> (healthcare team) must be kept to a minimum <ul style="list-style-type: none"> <li>○ Do not exceed 6 h without a full assessment. Group all assessments</li> <li>○ ALL examinations should be focused and brief</li> <li>○ Nursing to make every effort to collaborate with medical team for a group assessment</li> </ul> </li> <li>• <b>Diaper care</b> - lift from the hips and slide under (do not lift legs). Leave diaper open if possible for ELBW</li> <li>• <b>Fontanelle checks</b> – No routine assessments – may be deferred for 72 h (unless clinically indicated)</li> </ul>       |
| <p><b>Skin to Skin</b></p> <ul style="list-style-type: none"> <li>• Make every attempt to keep head and body midline (consider side-lying)</li> <li>• Infant transfer MUST be a 2 person process</li> <li>• Encourage “Hand Hugging” if unable to do Skin to Skin</li> </ul>                                                                                                                                                                                                                                                                                                                                                                                                                                                                                                                                                                                                                                                                                                                                                                                                                                                                                                                                                                                  |
| <p><b>Tests and Procedures</b></p> <ul style="list-style-type: none"> <li>• <b>Arterial line sampling</b> – technique – slow and steady</li> <li>• Continue with glucose testing (glucometer) as per policy or as ordered by MD/NP</li> <li>• Glucose by the UAL if present (no heel prick if UA). If correlating heel prick is required – contact medical team for approval</li> <li>• Lumbar puncture should be avoided until after 72 h</li> <li>• If infant requires an invasive procedure (PAL, chest tube, PICC line) consider Fentanyl bolus prior to procedure</li> <li>• <b>Head Ultrasound</b> – will require 2 person to adjust positioning as required to complete the test (US machine may need to enter room on opposite side if infant is in OMNI bed and backwards)</li> <li>• <b>Targeted ECHO</b> should be done at 24 or 72 h (less than 15 min). No routine ECHO unless otherwise clinically indicated</li> <li>• Routine <b>head ultrasounds</b> should be deferred until 72 h unless there are specific decision making concerns</li> <li>• Routine swabs may be deferred for 72 h – contact Infection Control to confirm reason for ordered test</li> <li>• <b>Research and Studies</b> - Permitted as approved by Staff MD</li> </ul> |
| <p><b>Transfer and X-Ray</b></p> <ul style="list-style-type: none"> <li>• Keep the OMNI bed for all babies less than 26<sup>6/7</sup> ELBW for 72 h</li> <li>• <b>X-ray</b> - avoid levelling the bed if possible – consider dorsal-decubitus (cross-table) view</li> </ul>                                                                                                                                                                                                                                                                                                                                                                                                                                                                                                                                                                                                                                                                                                                                                                                                                                                                                                                                                                                   |
